# Supplementary material for: Monthly Rainfall Prediction at Catchment Level with the Facebook Prophet Model Using Observed and CMIP5 Decadal Data
Source: MDPI journal article supplement (doi:10.3390/hydrology9060111), 2022-06-17
Supplement: s1 [file s1]

## Supplementary Information

Table S1: Regression models' parameters and their most possible values used in this study

| Regression Model | Parameters       | Parameter Values           |
|------------------|------------------|----------------------------|
| MLP              | solver           | Adam, lbfgs, sgd           |
|                  | learning rate    | 0.1, constant              |
|                  | batch_size       | Auto, 12                   |
|                  | activation       | Logistic, tanh, relu       |
| XGB              | n_estimators     | 100, 200, 300, 400, 500    |
|                  | colsample_bytree | 0.7, 0.8                   |
|                  | max_depth        | 1, 3, 6, 12                |
|                  | reg_alpha        | 1.1, 1.2, 1.3              |
|                  | reg_lambda       | 1.1, 1.2, 1.3              |
|                  | subsample        | 0.7, 0.8, 0.9              |
| LGB              | n_estimator      | 100, 200, 300, 400, 500    |
|                  | learning_rate    | 0.1, 0.12, 0.15            |
|                  | colsample_bytree | 0.7, 0.8                   |
|                  | max_depth        | 1, 3, 6, 12                |
|                  | num_leaves       | 1, 3, 5, 10, 20            |
|                  | reg_alpha        | 1.1, 1.2                   |
|                  | reg_lambda       | 1.1, 1.2                   |
|                  | min_split_gain   | 0.3, 0.4                   |
|                  | subsample        | 0.7, 0.8, 0.9              |
|                  | subsample_freq   | 10, 20                     |
| SVR              | kernel           | linear, poly, rbf, sigmoid |
|                  | degree           | 1, 2, 3                    |
|                  | gamma            | scale, auto                |
| RDF              | n_estimators     | 100, 200, 300, 400, 500    |
|                  | max_features     | Auto, sqrt                 |
|                  | max_depth        | 1, 3, 6, 12                |
|                  | min_sample_split | 1, 3, 6                    |
|                  | min_sample_leaf  | 1, 3, 6                    |
|                  | bootstrap        | true                       |
